# Supplementary material for: Carbapenem-Resistant Klebsiella pneumoniae Clinical Isolates: In Vivo Virulence Assessment in Galleria mellonella and Potential Therapeutics by Polycationic Oligoethyleneimine
Source: PubMed Central journal article supplement (PMC7826767; doi:10.3390/antibiotics10010056), 2021-01-08
Supplement: antibiotics-10-00056-s001.pdf [file antibiotics-10-00056-s001.pdf]

# Carbapenem-Resistant *Klebsiella pneumoniae* Clinical Isolates: In Vivo Virulence Assessment in *Galleria mellonella* and Potential Therapeutics by Polycationic Oligoethyleneimine

Dalila Mil-Homens <sup>1</sup>, Maria Martins <sup>1</sup>, José Barbosa <sup>1</sup>, Gabriel Serafim <sup>1</sup>, Maria J. Sarmiento <sup>2</sup>, Rita F. Pires <sup>1</sup>, Vitória Rodrigues <sup>3</sup>, Vasco D.B. Bonifácio <sup>1,\*</sup> and Sandra N. Pinto <sup>1,\*</sup>

<sup>1</sup> iBB-Institute for Bioengineering and Biosciences, Department of Bioengineering, Instituto Superior Técnico, Universidade de Lisboa, Av. Rovisco Pais, 1049-001 Lisboa, Portugal; dalilamil-homens@tecnico.ulisboa.pt (D.M-H.); mald.martins@campus.fct.unl.pt (M.M.); josembarbosa@tecnico.ulisboa.pt (J.J.); ritafpires@tecnico.ulisboa.pt (R.F.P.)

<sup>2</sup> J. Heyrovský Institute of Physical Chemistry of the Czech Academy of Sciences, Dolejškova 3, 18223 Prague 8, Czech Republic; maria.sarmiento@jh-inst.cas.cz

<sup>3</sup> Secção de Microbiologia, Laboratório SYNLAB - Lisboa, Grupo SYNLAB Portugal, Av. Columbano Bordalo Pinheiro, 75 A, 2º andar, 1070-061 Lisboa, Portugal; vitoria.rodrigues@synlab.pt

\* Correspondence: sandrapinto@ist.utl.pt (S.N.P); vasco.bonifacio@tecnico.ulisboa.pt (V.D.B.B.)

**Table S1.** *Klebsiella pneumoniae* clinical isolates origin and the minimum inhibitory concentration (MIC) values of trimethoprim (TM)/sulfamethoxazole (SM) antibiotics.

| Code  | Resistance* | Origin             | MIC TM/SM (µg/mL) |
|-------|-------------|--------------------|-------------------|
| SYN1  | KPC         | Biopsy             | ≥320              |
| SYN3  | OXA-48      | Rectal excrement   | ≥320              |
| SYN4  | OXA-48      | Urine              | ≥320              |
| SYN6  | KPC         | Urine              | ≥320              |
| SYN7  | KPC         | Purulent excrement | ≥320              |
| SYN8  | KPC         | Pus                | ≥320              |
| SYN9  | KPC         | Urine              | ≤20               |
| SYN17 | OXA-48      | Hemoculture        | ≥320              |
| SYN19 | KPC         | Perianal           | ≥320              |
| SYN22 | KPC         | Pus                | ≥320              |

\*All OXA-48 isolates are resistant to several antibiotics including TM/SM and ertapenem. KPC isolates are also resistant to several antibiotics including ertapenem, meropenem and TM/SM. In the case of TM/SM, SYN9 KPC was the only exception.

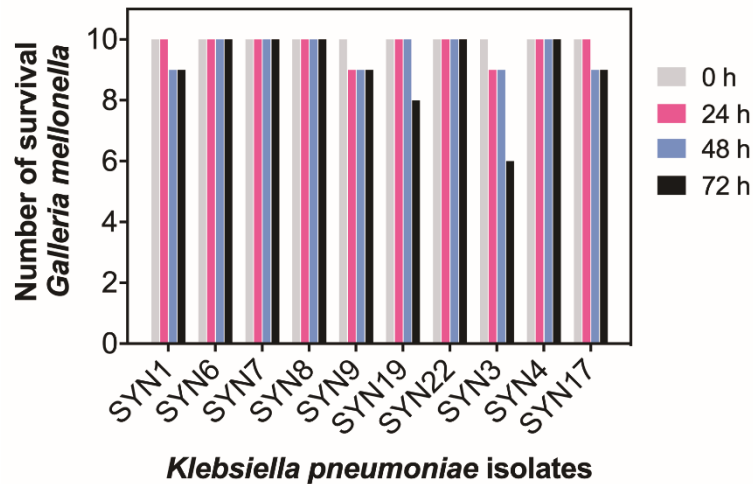

**Figure S1.** Evaluation of distinct virulence response of *Klebsiella pneumoniae* KPC(+) and OXA-48 (+) isolates in *G. mellonella*. The survival of *G. mellonella* was followed for 3 days after infection with *K. pneumoniae* KPC(+) and OXA-48(+) using  $10^4$  CFU per larva. Ten larvae were analysed in each condition and larvae survival was daily monitored. In all cases, no larvae death was observed upon administration of PBS (control).

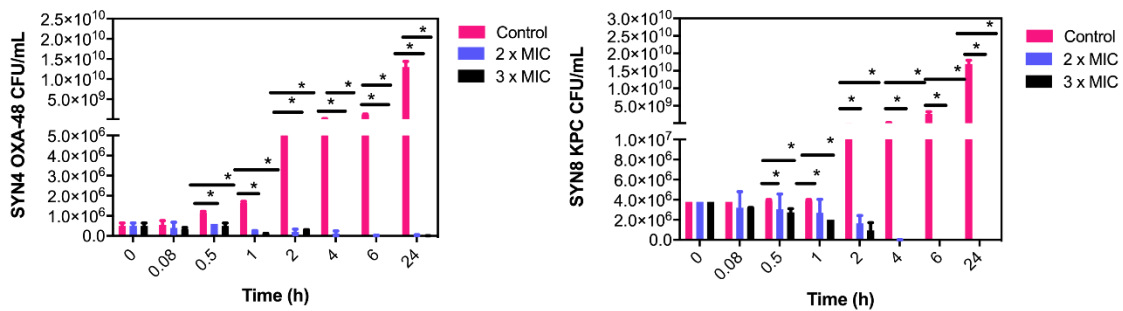

**Figure S2.** Killing kinetics of *Klebsiella pneumoniae* SYN4 OXA-48 (a) and SYN8 KPC (b) clinical isolates induced by linear oligoethyleneimine hydrochloride (L-OEI-h). The killing kinetics was evaluated with a colony count assay using two different polymer concentrations, 2  $\times$  MIC and 3  $\times$  MIC. Asterisks represent statistical significance in *t*-student test ( $p < 0.05$ ). Error bars represent standard deviation resultant from two biological replicates. Results are reported in CFU/mL.
